# Supplementary figures and images for: Intratumoral injection of TLR9 agonist promotes an immunopermissive microenvironment transition and causes cooperative antitumor activity in combination with anti-PD1 in pancreatic cancer
Source: HighWire-hosted journal article supplement (doi:10.1136/jitc-2021-002876), 2021-09-01

Supplementary Figure S2

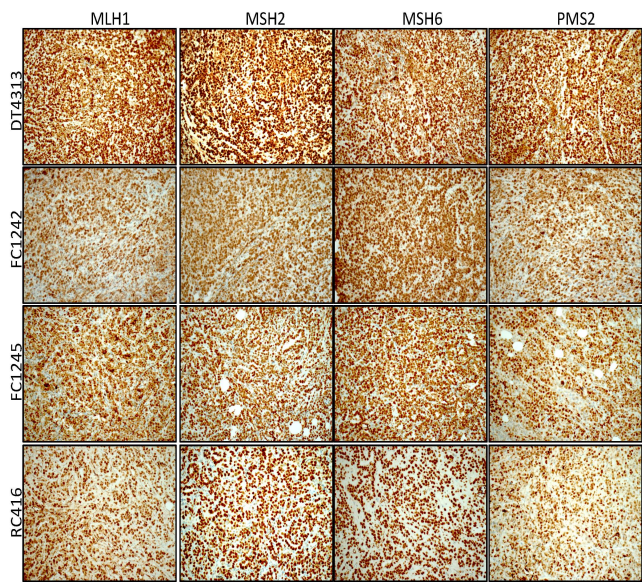

Supplement: jitc-2021-002876supp003_data_supplement.pdf [file jitc-2021-002876supp003_data_supplement.pdf]
