# Supplementary figures and images for: Intratumoral injection of TLR9 agonist promotes an immunopermissive microenvironment transition and causes cooperative antitumor activity in combination with anti-PD1 in pancreatic cancer
Source: PubMed Central journal article supplement — J Immunother Cancer. 2021 Sep 3;9(9):e002876. doi: 10.1136/jitc-2021-002876 (PMC8420705; doi:10.1136/jitc-2021-002876), 2021-09-03

## Supplementary Figure S3

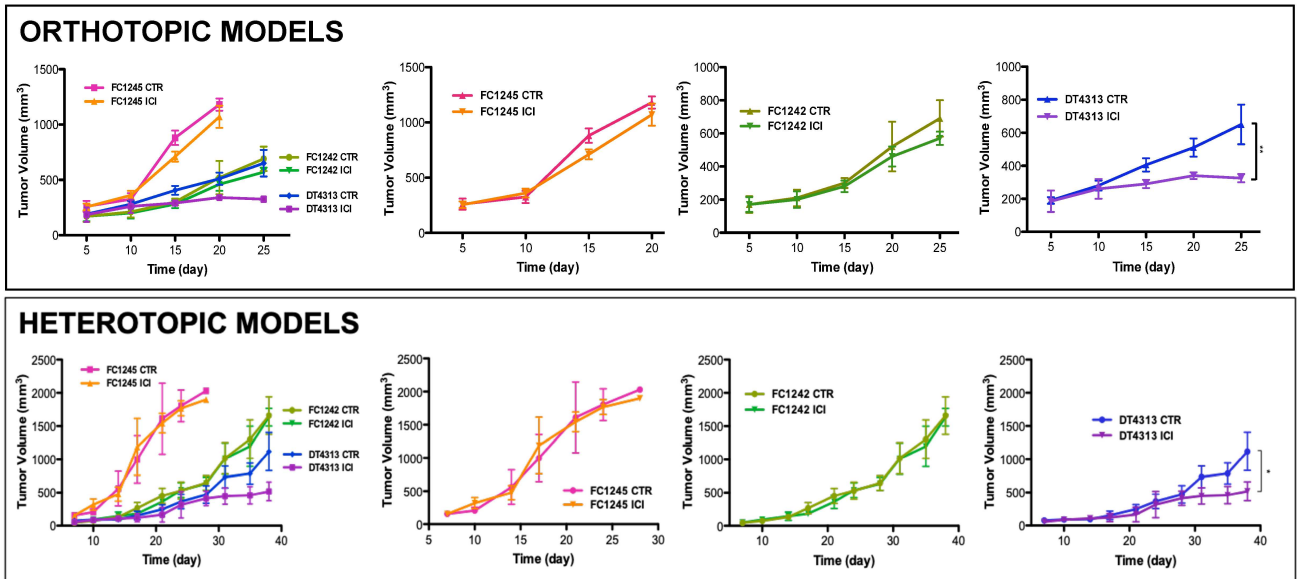

Supplement: jitc-2021-002876supp004.pdf [file jitc-2021-002876supp004.pdf]

## Supplementary Figure S5

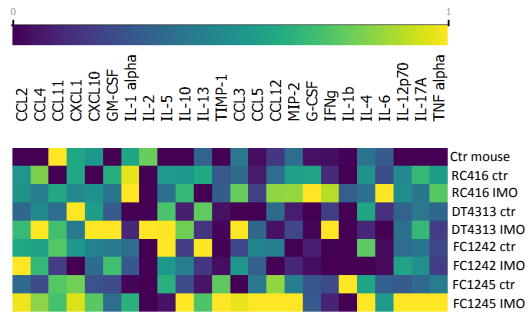

Supplement: jitc-2021-002876supp006.pdf [file jitc-2021-002876supp006.pdf]

# Supplementary Figure S9

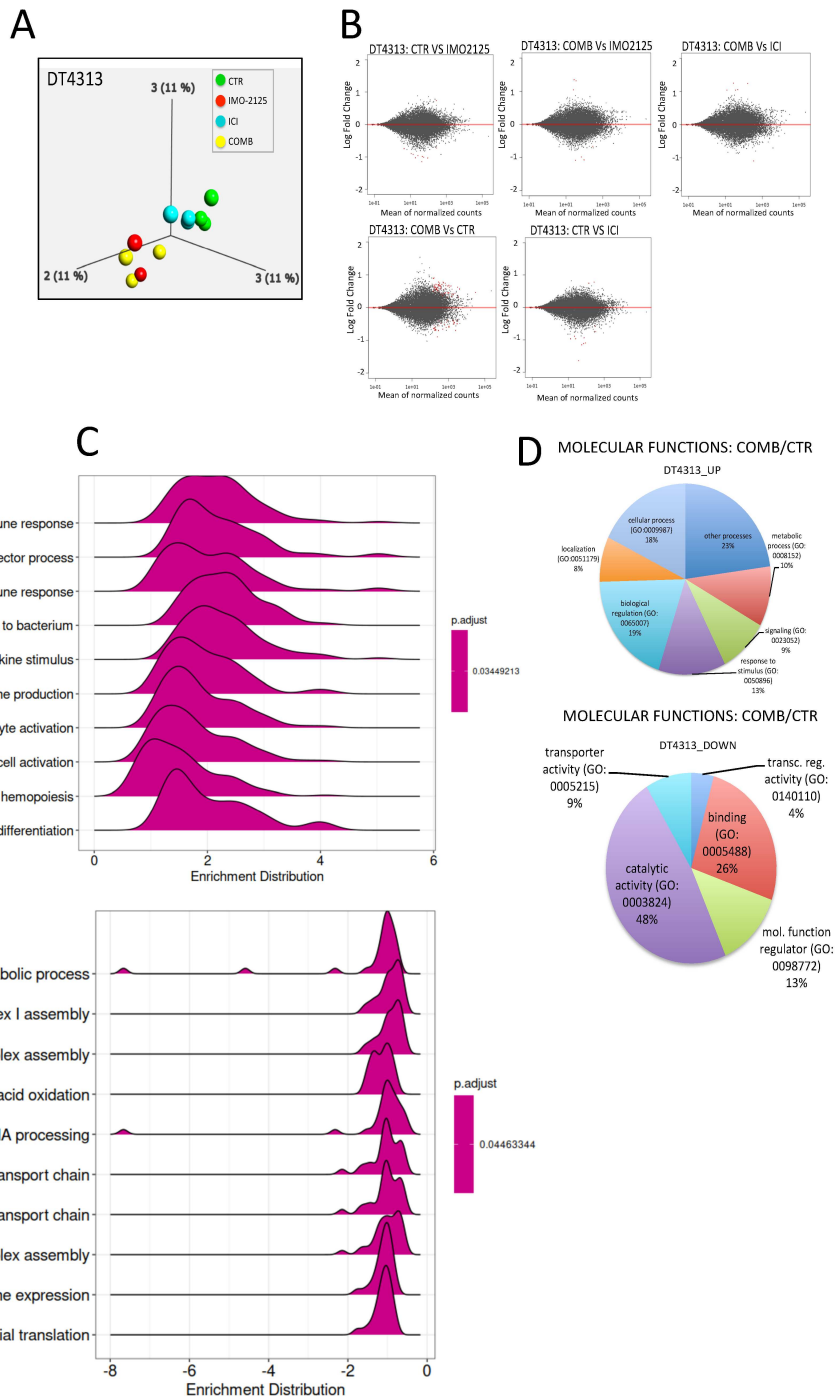

Supplement: jitc-2021-002876supp010.pdf [file jitc-2021-002876supp010.pdf]
